# Supplementary material for: Recent advances in understanding genetic variants associated with growth, carcass and meat productivity traits in sheep (&lt;i&gt;Ovis aries&lt;/i&gt;): an update
Source: Copernicus journal article supplement (doi:10.5194/aab-62-579-2019), 2019-10-23
Supplement: Supplementary file 1 [file aab-62-579-2019-supplement.zip]

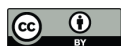

## *Supplement of*

# **Recent advances in understanding genetic variants associated with growth, carcass and meat productivity traits in sheep (*Ovis aries*): an update**

Alexander S. Zlobin et al.

Correspondence to: Yakov A. Tsepilov (tsepilov@bionet.nsc.ru)

- aab-62-579-2019-supplement-title-page.pdf
- 20190225\_gene\_set\_enrichment.docx
- 20190610\_Supplementary\_tables for\_Ovines\_2018\_paper.xlsx

The copyright of individual parts of the supplement might differ from the CC BY 4.0 License.
