# Supplementary material for: Recent advances in understanding genetic variants associated with growth, carcass and meat productivity traits in sheep (&lt;i&gt;Ovis aries&lt;/i&gt;): an update
Source: Copernicus journal article supplement (doi:10.5194/aab-62-579-2019), 2019-10-23
Supplement: Supplementary file 3 [file 20190610_Supplementary_tables for_Ovines_2018_paper.xlsx]

## Sheet: ST1
Supplementary table 1: Keyword combinations used for search and list of articles found on the first step of analysis.
Legend:
GS - Google scholar PM - Pubmed
	How many?		How many relevant from top 20?
Keyword combinations	GS	PM	GS	PM	LIST OF DOI OR PUBMED ID
sheep growth production traits GWAS	3710	13	5	7	DOI: 10.1371/journal.pone.0159504 DOI: 10.1186/s12711-016-0191-3 DOI: 10.1186/s12711-015-0142-4 PMID: 25846889 DOI: 10.1186/s12711-017-0316-3 DOI: 10.1371/journal.pone.0128688
ovine growth production traits GWAS	2330	9	5	5	DOI: 10.1371/journal.pone.0159504 DOI: 10.1186/s12711-016-0191-3 DOI: 10.1186/s12711-015-0142-4 PMID: 25846889 DOI: 10.1017/S1751731117002488 DOI: 10.1371/journal.pone.0128688
Ovis aries growth production traits GWAS	254	5	6	3	DOI: 10.1371/journal.pone.0074700 DOI: 10.1186/s12711-017-0316-3 DOI: 10.1371/journal.pone.0159504 DOI: 10.1186/s12711-015-0142-4 PMID: 25846889 DOI: 10.1371/journal.pone.0128688
sheep meat production traits GWAS	1010	6	8	5	DOI: 10.1186/s12711-015-0142-4 DOI: 10.1186/s12711-016-0191-3 DOI: 10.1371/journal.pone.0159504 PMID: 25846889 DOI: 10.1371/journal.pone.0074700 DOI: 10.1017/S1751731117002488 DOI: 10.1371/journal.pone.0128688 PMID: 29932070
Ovine meat production traits GWAS	1240	5	7	5	DOI: 10.1186/s12711-015-0142-4 DOI: 10.1186/s12711-015-0169-6 PMID: 29932070 DOI: 10.1186/s12711-017-0316-3 DOI: 10.1371/journal.pone.0159504 DOI: 10.1371/journal.pone.0128688 PMID: 25846889 DOI: 10.1017/S1751731117002488
Ovis aries meat production traits GWAS	166	3	8	3	PMID: 25846889 DOI: 10.1186/s12711-015-0142-4 DOI: 10.1186/s12711-017-0316-3 DOI: 10.1371/journal.pone.0074700 DOI: 10.1371/journal.pgen.1006997 DOI: 10.1186/s12711-015-0169-6 DOI: 10.1371/journal.pone.0159504 DOI: 10.1371/journal.pone.0128688
sheep growth production traits genome wide association study	17800	11	3	4	DOI: 10.1038/hdy.2012.90 DOI: 10.1186/s12711-016-0191-3 DOI: 10.1017/S1751731117002488 DOI: 10.1186/s12711-017-0316-3 DOI: 10.1186/s12711-015-0142-4
sheep birth weight GWAS	990	2	10	2	DOI: 10.1017/S1751731117002488 DOI: 10.1016/j.nut.2013.05.011 DOI: 10.1016/j.smallrumres.2017.11.005 DOI: 10.1186/s12711-015-0142-4 DOI: 10.1016/j.smallrumres.2017.01.002 PMID: 25846889 DOI: 10.1371/journal.pone.0074700 DOI: 10.1371/journal.pgen.1005629 DOI: 10.1186/s12711-017-0316-3 DOI: 10.1038/hdy.2012.90
sheep weaning weight GWAS	399	5	10	5	DOI: 10.13140/2.1.2129.8564 http://www.wcgalp.org/system/files/proceedings/2014/estimating-genomic-variance-explained-chromosome-using-pedigree-and-genomic-data-sheep.pdf DOI: 10.1371/journal.pone.0074700 PMID: 25846889 DOI: 10.1186/s12711-015-0142-4 DOI: 10.1016/j.smallrumres.2017.01.002 http://agbu.une.edu.au/AAABG%202017/10Dakhlan22045.pdf DOI: 10.1371/journal.pone.0159504 DOI: 10.1111/age.124…
sheep 6-month weight GWAS	110	2	4	2	DOI: 10.1371/journal.pone.0159504 DOI: 10.1016/j.smallrumres.2017.01.002 DOI: 10.1016/j.smallrumres.2018.01.022
sheep eye muscle area GWAS	358	1	2	1	DOI : 10.5958/0973-9718.2017.00052.6 DOI: 10.1186/s12864-016-2538-0
sheep fat thickness GWAS	437	1	8	1	DOI: 10.1016/j.smallrumres.2017.11.005 DOI: 10.1371/journal.pone.0159504 DOI: 10.1016/j.smallrumres.2016.12.026 DOI: 10.1371/journal.pone.0128688 DOI: 10.1111/age.12699 DOI : 10.5958/0973-9718.2017.00052.6 DOI: 10.2527/asasann.2017.214
sheep daily weight gain GWAS	503	1	10	1	DOI: 10.1186/s12711-015-0142-4 PMID: 25846889 https://www.researchgate.net/publication/268109712_Genome-Wide_Association_Study_on_Body_Weight_Reveals_Major_Loci_on_OAR6_in_Australian_Merino_Sheep DOI: 10.2527/asasann.2017.214 DOI : 10.5958/0973-9718.2017.00052.6 DOI: 10.1186/s12711-017-0316-3 DOI: 10.1186/s12711-017-0316-3 http://www.teses.usp.br/teses/disponiveis/11/11139/tde-20032018-160145/en.…
sheep growth production traits SNP	12400	15	7	8	DOI: 10.1016/j.gene.2013.05.066 DOI: 10.1186/1471-2156-14-1 DOI: 10.1186/s12863-017-0476-8 DOI: 10.1186/1471-2156-15-34 PMID: 25846889 DOI: 10.1186/s12711-016-0191-3 DOI: 10.1016/j.meatsci.2018.06.014 DOI: 10.1017/S1751731117002488 DOI: 10.1186/s12711-017-0316-3 DOI: 10.1016/j.gene.2016.10.004 DOI: 10.1186/s12711-015-0142-4 DOI: 10.1007/s11033-014-3451-8 DOI: 10.1017/S1751731114000081
sheep growth production traits gene candidate	16000	17	3	5	DOI: 10.1016/j.gene.2013.05.066 DOI: 10.1371/journal.pone.0159504 DOI: 10.4238/2013.April.2.12 DOI: 10.1007/s12041-018-0941-9 DOI: 10.1017/S1751731117002488 DOI: 10.1186/s12711-017-0316-3 DOI: 10.1371/journal.pone.0128688 DOI: 10.1371/journal.pone.0066569

## Sheet: ST2
Supplementary table 2: Papers used for citation tree anaysis and list of articles found on the second step of analysis.
Legend:
GS - Google scholar PM - Pubmed
Cited paper	GS	PM	List of relevant papers	Overlap with ST1
DOI: 10.1371/journal.pone.0066569	55	15	DOI: 10.15302/J-FASE-2017151 DOI: 10.1016/j.theriogenology.2017.05.011 DOI: 10.1017/S1751731117002488 DOI: 10.2298/GENSR1601097T DOI: 10.12681/jhvms.15475 DOI: 10.1007/s12041-018-0941-9 DOI: 10.16288/j.yczz.17-021 DOI: 10.1371/journal.pone.0128688 DOI: 10.1371/journal.pone.0159504 DOI: 10.1016/S2095-3119(15)61080-2 PMID: 25846889 DOI: 10.1111/age.12455 DOI: 10.1186/s12711-017-0316-3 DOI: 10.1038/…	7
DOI: 10.1186/s12711-017-0316-3	8	2	DOI: 10.1007/s12041-018-0941-9	0
DOI:10.1371/journal.pone.0128688	11	3		0

## Sheet: ST3
Supplementary Table 3: Summary for all manually curated papers ranked by relevance.
First author	Title	Year	Journal	DOI	Trait	GWAS or gene candidate?	DNA array, if available	Sample size	Species or breed	Range (1 - useful, 2 - medium, still good, 3 - not usefull)
Riggio et al.	Genome-wide association and regional heritability mapping to identify loci underlying variation in nematode resistance and body weight in Scottish Blackface lambs	2013	Heredity	10.1038/hdy.2012.90	nematode resistance, body weight	GWAS	50k single-nucleotide polymorphism (SNP) chip	752	Scottish Blackface lambs	1
Zhang et al.	Genome-wide association studies for growth and meat production traits in sheep	2013	PLoS ONE	10.1371/journal.pone.0066569	post-weaning gain	GWAS	OvineSNP50 BeadChip	319	Sunit sheep, German Mutton sheep, Dorper sheep	1
Jalil-Sarghale et al.	Association of pituitary specific transcription factor-1 (POU1F1) gene polymorphism with growth and biometric traits and blood metabolites in Iranian Zel and Lori-Bakhtiari sheep	2014	Mol Biol Report	10.1007/s11033-014-3451-8	growth and biometric traits	gene candidate		90	Zel and Lori-Bakhtiari	1
Al-Mamun et al.	Genome-wide association study of body weight in Australian Merino sheep reveals an orthologous regionon OAR6 to human and bovine genomic regions affecting height and weight	2015	Genetics Selection Evolution	10.1186/s12711-015-0142-4	body weight	GWAS	Illumina Ovine SNP50 BeadChip	1781	Australian Merino sheep were	1
Ma et al.	Effect of polymorphisms in the CAMKMT gene on growth traits in Ujumqin sheep	2016	Animal Genetics	10.1111/age.12455		gene candidate		343	Ujumqin	1
Bolormaa et al.	Detailed phenotyping identifies genes with pleiotropic effects on body composition	2016	BMC Genomics	10.1186/s12864-016-2538-0	56 carcass composition traits	GWAS (meta-analysis)	Ovine Infinium® HD SNP Bead- Chip, Illumina 50k Ovine SNP chip	10613	MER, PD, BL, SUF, WS, TEX, CORR, COOP, and MIX	1
Trukhachev et al.	MEF2B gene SNP markers of meat productivity in Severokavkazskaya sheep breed	2016	Genetika	10.2298/GENSR1601097T	meat production	gene candidate		19	Severokavkazskaya	1
Matika et al.	Genome-wide association reveals QTL for growth, bone and in vivo carcass traits as assessed by computed tomography in Scottish Blackface lambs	2016	Genetics Selection Evolution	10.1186/s12711-016-0191-3	carcass traits	GWAS		751	Scottish Blackface lamb	1
Zhang et al.	Identification of MEF2B and TRHDE Gene Polymorphisms Related to Growth Traits in a New Ujumqin Sheep Population	2016	PLOS ONE	10.1371/journal.pone.0159504	growth traits	gene candidate		343	Ujumqin	1
Aali et al.	Association of the calpastatin genotypes, haplotypes, and SNPs with meat quality and fatty acid composition in two Iranian fat- and thin-tailed sheep breeds	2017	Small Ruminant Research	10.1016/J.SMALLRUMRES.2016.12.026	fatty acid composition & meat quality	gene candidate		59	Chall and Zel Iranian sheeps	1
Kominakis et al.	Combined GWAS and ‘guilt by association’-based prioritization analysis identifies functional candidate genes for body size in sheep	2017	Genetics Selection Evolution	10.1186/s12711-017-0316-3	10 meat traits	GWAS	Illumina OvineSNP50 BeadChip	524	Frizarta	1
Pasandideh et al.	A genome scan for quantitative trait loci affecting average daily gain and Kleiber ratio in Baluchi Sheep	2018	Journal of Genetics	10.1007/s12041-018-0941-9	daily gain and Kleiber ratio	GWAS	Illumina OvineSNP50 BeadChip	96	Baluchi	1
Armstrong et al.	Novel genetic polymorphisms associated with carcass traits in grazing Texel sheep	2018	Meat Science	10.1016/j.meatsci.2018.06.014	Carcass and meat traits	gene candidate		461	Texel	1
Garza Hernandez et al.	Analysis of single nucleotide polymorphisms variation associated with important economic and computed tomography measured traits in Texel sheep	2018	animal	10.1017/S1751731117002488	Growth and carcass traits	GWAS	50 K SNP genome-wide array	384	Texel	1
Våge et al.	A missense mutation in growth differentiation factor 9 (GDF9) is strongly associated with litter size in sheep	2013	BMC Genetics	10.1186/1471-2156-14-1	litter size	GWAS	ovine 50K SNP chip from Illumina	378	Norwegian White Sheep	2
Cinar et al.	Ovar-DRB1 haplotypes *2001 and *0301 are associated with sheep growth and ewe lifetime prolificacy	2016	Gene	10.1016/j.gene.2016.10.004	sheep growth and ewe lifetime prolificacy	gene candidate		370	Rambouillet, Columbia, Polypay	2
Xu et al.	Recent advances in understanding genetic variants associated with economically important traits in sheep (Ovis aries) revealed by high-throughput screening technologies	2017	Frontiers of Agricultural Science and Engineering	10.15302/J-FASE-2017151	lean meat yield, marbling, meat production and quality, fatty acid formation					2
Sahu et al.	Advances in genomic strategies to improve growth and meat production traits in sheep:An overview	2017	Indian Journal of Small Ruminants	10.5958/0973-9718.2017.00052.6						2
Bahrami et al.	Genetic polymorphisms and protein structures in growth hormone, growth hormone receptor, ghrelin, insulin-like growth factor 1 and leptin in Mehraban sheep	2013	Gene	10.1016/j.gene.2013.05.06	growth hormone, growth hormone receptor, ghrelin, insulin-like growth factor 1 and leptin	gene candidate		452	Mehraban sheep	3
Gonzalez et al.	A Divergent Artiodactyl MYADM-like Repeat Is Associated with Erythrocyte Traits and Weight of Lamb Weaned in Domestic Sheep	2013	PLoS ONE	10.1371/journal.pone.0074700	Mean Corpuscular Hemoglobin Concentration (MCHC)	GWAS	OvineSNP50 Infinium BeadChip	521	Columbia, Polypay, and Rambouillet	3
Zhang et al.	Polymorphisms of the myostatin gene (MSTN) and its relationship with growth traits in goat breeds.	2013	Genetics and Molecular Research	10.4238/2013.April.2.12	growth traits	gene candidate		288	Anhui white goat and Boer goat	3
Paliy et al.	Excess body weight during pregnancy and offspring obesity: Potential mechanisms	2014	Nutrition	10.1016/j.nut.2013.05.011						3
Randhawa et al.	Composite selection signals can localize the trait specific genomic regions in multi-breed populations of cattle and sheep	2014	BMC Genetics	10.1186/1471-2156-15-34						3
Riggio et al.	Accuracy of genomic prediction within and across populations for n ematode resistance and body weight traits in sheep	2014	animal	10.1017/S1751731114000081						3
Al-Mamun et al.	Genome-wide linkage disequilibrium and genetic diversity in five populations of Australian domestic sheep	2015	Genetics Selection Evolution	10.1186/s12711-015-0169-6				322	Chinese Mongolian fat-tailed, German Mutton Merino, African white Dorper	3
Wang et al.	Genome-Wide Specific Selection in Three Domestic Sheep Breeds	2015	PLoS ONE	10.1371/journal.pone.0128688	meat traits related to marbling, meat production		Illumina OvineSNP50 BeadChip array			3
Cao et al.	DNA methylation Landscape of body size variation in sheep	2015	Scientific reports	10.1038/srep13950					Chinese Mongolian sheep	3
Zhao et al.	A genome scan of recent positive selection signatures in three sheep populations	2016	Journal of Integrative Agriculture	10.1016/S2095-3119(15)61080-2			OvineSNP50 Genotyping BeadChip		Sunite, German Mutton, Dorper	3
Tongyu et al.	Advances in genome-wide association studies for important traits in sheep and goats	2016	Hereditas(Beijing)	10.16288/J.YCZZ.17-021						3
Martinez-Royo et al.	Genome-wide association studies for reproductive seasonality traits in Rasa Aragonesa sheep breed	2017	Theriogenology	10.1016/J.THERIOGENOLOGY.2017.05.011	Three reproductive seasonality traits	GWAS	Illumina OvineSNP50 Beadchip	239	Rasa Aragonesa	3
Brito et al.	Prediction of genomic breeding values for growth, carcass and meat quality traits in a multi-breed sheep population using a HD SNP chip	2017	BMC Genetics	10.1186/s12863-017-0476-8		GWAS	Ovine Infinium® HD SNP Beadchip	14845	New Zealand Terminal Sire	3
Martínez-Quintana et al.	The leptin R84Q mutation is present in Charollais sheep, increasing fat deposition of carrier crossbred lambs	2017	Journal of Animal Science	10.2527/asasann.2017.214		gene candidate		172	Charollais	3
Amiri Roudbar et al.	Estimates of variance components due to parent-of-origin effects for body weight in Iran-Black sheep	2017	Small Ruminant Research	10.1016/J.SMALLRUMRES.2017.01.002						3
Clark et al.	A high resolution atlas of gene expression in the domestic sheep (Ovis aries)	2017	PLOS Genetics	10.1371/journal.pgen.1006997						3
AKIŞ et al.	Genetic Polymorphisms of Cyp19 and Myostatin Genes in Turkish Indigenous Sheep Breeds	2018	Journal of the Hellenic Veterinary Medical Society	10.12681/jhvms.15475	growth traits	gene candidate		176	Chiose, Imroz, Kivircik, Zom and Morkaraman	3
Ma et al.	Genetic variants in fat- and short-tailed sheep from high-throughput RNA-sequencing data	2018	Animal Genetics	10.1111/age.12699	Fat tail	gene candidate		9	Lanzhou Fat-Tail	3
Amiri Roudbar et al.	Estimation of the variance due to parent-of-origin effects for productive and reproductive traits in Lori-Bakhtiari sheep	2018	Small Ruminant Research	10.1016/J.SMALLRUMRES.2018.01.022						3
Sabbioni et al.	Allometric coefficients for carcass and non-carcass components in a local meat-type sheep breed	2018	Small Ruminant Research	10.1016/J.SMALLRUMRES.2017.11.005						3
Ghasemi et al.	Genome-wide association study of birth weight in sheep	2019	animal	10.1017/S1751731118003610	Birth weight	GWAS	Illumina OvineSNP50 Beadchip	132	Lori-Bakhtiari	1

## Sheet: ST4
Supplementary Table 4: Genes associated with traits of interest from final list of 17 papers.
Legend:
PC - principal component of body weight Prioritization - yes, if the method different from positional prioritization was used
First author	Title	DOI	Year	Journal	Breed	Sample size	GWAS or gene candidate	DNA array, if available	Trait	Gene	Prioritization method
Riggio et al.	Genome-wide association and regional heritability mapping to identify loci underlying variation in nematode resistance and body weight in Scottish Blackface lambs	10.1038/hdy.2012.90	2013	Heredity	Scottish Blackface	752	GWAS	Illumina 50K ovine	body weight
Zhang et al.	Genome-Wide Association Studies for Growth and Meat Production Traits in Sheep	10.1371/journal.pone.0066569	2013	PloS One	Sunit sheep, German Mutton sheep, Dorper sheep	319	GWAS	Illumina 50K ovine	post-weaning gain	GRM1
										POL
										MEF2B, FXANK
										CAMKMT
										MBD5
										TRHDE
										UBR2
										RIPK2
										RPL7
										SMC2
Jalil-Sarghale et al.	Association of pituitary specific transcription factor-1 (POU1F1) gene polymorphism with growth and biometric traits and blood metabolites in Iranian Zel and Lori-Bakhtiari sheep	10.1007/s11033-014-3451-8	2014	Mol Biol Report	Zel and Lori-Bakhtiari	90	gene candidate		weaning weight	POU1F1
Al-Mamun et al.	Genome-wide association study of body weight in Australian Merino sheep reveals an orthologous region on OAR6 to human and bovine genomic regions affecting height and weight	10.1186/s12711-015-0142-4	2015	Genetics Selection Evolution	Australian Merino	1781	GWAS	Illumina 50K ovine	body weight	NCAPG
										LCORL
Ma et al.	Effect of polymorphisms in the CAMKMT gene on growth traits in Ujumqin sheep	10.1111/age.12455	2016	Animal Genetics	Ujumqin	343	gene candidate		post-weaning gain	CAMKMT
Bolormaa et al.	Detailed phenotyping identifies genes with pleiotropic effects on body composition	10.1186/s12864-016-2538-0	2016	BMC Genomics	MER, PD, BL, SUF, WS, TEX, CORR, COOP, and MIX	10613	GWAS (meta-analysis)	Ovine Infinium® HD SNP Bead- Chip, Illumina 50k Ovine	body composition (fat and muscle proportions)	GHR	yes
										UST
										LCAT
										SLC16A13
										PLCB1
										SNX24
										PACRGL
										PI4K2B
										PPARGC1A
										ALOX12
										STX8
										MYH15
										ALPK1
										TBCK
										PPP3CA
										RAP1GDS1
										BMPR1B
										MEPE
										NCAPG
										LCORL
										ARAP2
										FRYL
										PLAG1
										ASCL1
										ACACA
										SYNRG
										FASN
										SGK2
										MLXIPL
										ISYNA1
										SNORA70
										ELOVL6
										AGPAT9
										MRPS25
										MB
										PRKAA2
										ERBB4
										PLCD4
										CYP27A1
										NETO1
										APOL6
										PROCA1
										CAPN1
										ABCC9
										CAST
										WARS
										BEGAIN
										DLK1
										MEG3_2
										MEG8_2
										MARK3
										LAMA4
										MEF2A
										FARP2
										PKD2L1 (SCDb)
										B3GALT6
										SAMD11
										MYO1H
										GLTPD1
										GYS1
										PPP1R3A
										PNPLA3
										FADS2
										5S_rRNA
										SMIM13
										ELOVL2
										U1
										USP54
Trukhachev et al.	MEF2B gene SNP markers of meat productivity in Severokavkazskaya sheep breed	10.2298/GENSR1601097T	2016	Genetika	Severokavkazskaya	19	gene candidate		meat productivity	MEF2B
Cinar et al.	Ovar-DRB1 haplotypes *2001 and *0301 are associated with sheep growth and ewe lifetime prolificacy	10.1016/j.gene.2016.10.004	2016	Gene	Rambouillet, Columbia, Polypay	370	gene candidate		sheep growth and ewe lifetime prolificacy	DRB1
Matika et al.	Genome-wide association reveals QTL for growth, bone and in vivo carcass traits as assessed by computed tomography in Scottish Blackface lambs	10.1186/s12711-016-0191-3	2016	Genetics Selection Evolution	Scottish Blackface lamb	751	GWAS	Illumina 50K ovine	Bone area at the ischium
Zhang et al.	Identification of MEF2B and TRHDE Gene Polymorphisms Related to Growth Traits in a New Ujumqin Sheep Population	10.1371/journal.pone.0159504	2016	PloS One	Ujumqin	343	gene candidate		growth traits	MEF2B
										TRHDE
Xu et al.	Recent advances in understanding genetic variants associated with economically important traits in sheep (Ovis aries) revealed by high-throughput screening technologies	10.15302/J-FASE-2017151	2017	Frontiers of Agricultural Science and Engineering			review		lean meat yield	GDF8
									marbling	ALDOA
										FAM190A
										STK32B
									meat production and quality	GHR
									fatty acid formation	ACACA
										EVOLV6
										FASN
										MLXIPL
										SYNRG
									Muscling and shear force	MEG3
										MEG38
										DLK1
									body size	NRP2
										HMGA2
										BMP2
										GPX3
										FSTL1
										PVR
										EXT2
										ALT4
										SOX6
										HAND2
										PDGFD
										BMPR2
										GHR
										ANKS1B
									Post-weaning gain	GSTRBP
										TRAMIL1
										PHF15
										PRSS12
										MAN1A1
										SYNE1
										WAPAL
										DAAM1
										OST/SPP1
										MEPE
										IBSP
										NCAPG
										LCORL
									Bone-related traits	SPP1
										MEPE
										IBSP
										LCORL
										NCAPG
Aali et al.	Association of the calpastatin genotypes, haplotypes, and SNPs with meat quality and fatty acid composition in two Iranian fat- and thin-tailed sheep breeds	10.1016/J.SMALLRUMRES.2016.12.026	2017	Small Ruminant Research	Chall and Zel Iranian	59	gene candidate		fatty acid composition & meat quality	CAST
Sahu et al.	Advances in genomic strategies to improve growth and meat production traits in sheep: An overview	10.5958/0973-9718.2017.00052.6	2017	Indian Journal of Small Ruminants			review		growth and meat production traits	MSTN
										IGF-1
										GHR
Kominakis et al.	Combined GWAS and ‘guilt by association’-based prioritization analysis identifies functional candidate genes for body size in sheep	10.1186/s12711-017-0316-3	2017	Genetics Selection Evolution	Frizarta	524	GWAS	Illumina 50K ovine	PC2	TP53	yes
									PC1	BMPR1A
									PC2	PIK3R5
									PC2	RPL26
									PC2	PRKDC
									PC1	NODAL
									PC1	PRF1
									PC1	COL13A1
									PC1	HK1
									PC3	APAF1
									PC2	MYH10
									PC2	POLR2A
									PC2	DVL2
									PC2	CHRNB1
									PC2	CTC1
									PC1	AHI1
									PC2	SLC2A4
									PC1	LDB3
									PC1	PEX7
									PC2	GUCY2D
									PC1	MAP3K5
									PC1	NHLRC1
									PC2	EIF4A1
									PC2	ALOXE3
									PC3	FHIT
									PC2	NTN1
									PC2	HES7
									PC2	TMEM107
									PC2	PSMA8
									PC2	ATP1B2
									PC2	ACADVL
									PC2	FGF11
									PC1	MYB
									PC2	TNFSF12
									PC2	TNK1
									PC1	ADAMTS14
									PC2	ALOX12B
									PC1	MMRN2
									PC2	ZNF521
Pasandideh et al.	A genome scan for quantitative trait loci affecting average daily gain and Kleiber ratio in Baluchi Sheep	10.1007/s12041-018-0941-9	2018	Journal of Genetics	Baluchi	96	GWAS	Illumina 50K ovine	Kleiber ratio	ZNF770
										MAGI1
Armstrong et al.	Novel genetic polymorphisms associated with carcass traits in grazing Texel sheep	10.1016/j.meatsci.2018.06.014	2018	Meat Science	Texel	461	gene candidate		valuable cuts weight, hot carcass weight and carcass fatness	PPARGC1A
									live weights, fat thickness, rib-eye area and shoulder weight	DGAT1
									birth weight and fat thickness	CAST
									with birth weight and carcass fatness	GHR
									live weights and fat thickness	GHRHR
									grid reference site	ITGB1
									weight at ultrasound measures	SCAP
									rib-eye area	SCD5
										DGAT1
									birth weight, weaning weight	SERPINA3
									weaning weight	HSPB1
Garza Hernandez et al	Analysis of single nucleotide polymorphisms variation associated with important economic and computed tomography measured traits in Texel sheep	10.1017/S1751731117002488	2018	animal	Texel	384	GWAS	Illumina 50K ovine	8-week body weight	PCDH18
									fat depth	NDUFAF2
									CT lean weight	CUEDC1
									muscle depth	ACACA
Ghasemi et al.	Genome-wide association study of birth weight in sheep	10.1017/S1751731118003610	2019	animal	Lori-Bakhtiari	132	GWAS	Illumina 50K ovine	birth weight	KCNJ13
										GIGYF2
										RAB6B
										Tf
										OPALIN
										DNTT
										TLL2

## Sheet: ST5
Supplementary Table 5: QTLs associated with traits of interest from final list of 17 papers.
Legend:
RefA	Reference allele
EffA	Effective allele (allele for which the effect was estimated)
										INFORMATION FROM PAPER													Technical information from Ovine Infinium® HD SNP Bead- Chip (if availble)
First author	Title	DOI	Year	Journal	Breed	Sample size	GWAS or gene candidate	DNA array, if available	Trait	SNP (as presented in paper)	Effect size (if availble)	SE	P-value	Chr	Position (as prsented in paper)	N (if different)	EffA (or good allele)	RefA	Effective Alelle Frequency	Gene/Nearest gene	Forward primer sequences	Reverse primer sequences	SNP	Chr_chip	Pos_chip	GT.score	SNPA	ILMN.Strand	Customer.Strand	rs name (rs id)	ss name (ss id)
Riggio et al.	Genome-wide association and regional heritability mapping to identify loci underlying variation in nematode resistance and body weight in Scottish Blackface lambs	10.1038/hdy.2012.90	2013	Heredity	Scottish Blackface	752	GWAS	Illumina 50K ovine	body weight average animal effect	OAR21_7449077.1			5.01e-07	21	6166019	732							OAR21_7449077.1	21	6218306	0.8406	[T/C]	BOT	BOT	rs417007851	ss836336220
									body weight at 16 weeks	OAR6_40855809.1			1.95e-06	6	36712666	687							OAR6_40855809.1	6	36655091	0.8669	[T/C]	BOT	TOP	rs400970883	ss836346137
									body weight average animal effect	OAR21_7518471.1			2.88e-06	21	6233919	718							OAR21_7518471.1	21	6291512	0.8656	[A/G]	TOP	TOP	rs402607633	ss836336222
									body weight at 16 weeks	OAR6_37176737.1			4.07e-06	6	33235218	686							OAR6_37176737.1	6	33197652	0.7945	[T/C]	BOT	BOT	rs426360026	ss836346085
									body weight average animal effect	OAR6_37176737.1			6.03e-06	6	33235218	733							OAR6_37176737.1	6	33197652	0.7945	[T/C]	BOT	BOT	rs426360026	ss836346085
									body weight average animal effect	OAR6_40855809.1			1.2e-05	6	36712666	734							OAR6_40855809.1	6	36655091	0.8669	[T/C]	BOT	TOP	rs400970883	ss836346137
									body weight at 16 weeks	OAR6_41558126.1			1.29e-05	6	37398340	685							OAR6_41558126.1	6	37334387	0.8722	[T/G]	BOT	TOP	rs159958223	ss836346144
									body weight at 24 weeks	OAR21_7449077.1			1.91e-05	21	6166019	711							OAR21_7449077.1	21	6218306	0.8406	[T/C]	BOT	BOT	rs417007851	ss836336220
									body weight at 16 weeks	OAR6_41768532.1			2.95e-05	6	37597445	687							OAR6_41768532.1	6	37533664	0.8967	[A/G]	TOP	TOP	rs415940846	ss836346147
									body weight at 24 weeks	OAR6_37176737.1			3.09e-05	6	33235218	712							OAR6_37176737.1	6	33197652	0.7945	[T/C]	BOT	BOT	rs426360026	ss836346085
									body weight at 20 weeks	OAR5_27258602.1			4.27e-05	5	24626435	438							OAR5_27258602.1	5	24356445	0.8736	[T/C]	BOT	TOP	rs405530710	ss836344271
									body weight average animal effect	OAR6_41768532.1			7.24e-05	6	37597445	734							OAR6_41768532.1	6	37533664	0.8967	[A/G]	TOP	TOP	rs415940846	ss836346147
									body weight at 24 weeks	OAR6_41558126.1			7.41e-05	6	37398340	711							OAR6_41558126.1	6	37334387	0.8722	[T/G]	BOT	TOP	rs159958223	ss836346144
									body weight average animal effect	OAR2_143636803.1			8.32e-05	2	135512476	733							OAR2_143636803.1	2	135063522	0.8102	[T/C]	BOT	BOT	rs403445816	ss836332229
									body weight at 20 weeks	OAR6_40855809.1			8.71e-05	6	36712666	446							OAR6_40855809.1	6	36655091	0.8669	[T/C]	BOT	TOP	rs400970883	ss836346137
									body weight at 24 weeks	OAR6_40855809.1			9.55e-05	6	36712666	713							OAR6_40855809.1	6	36655091	0.8669	[T/C]	BOT	TOP	rs400970883	ss836346137
Zhang et al.	Genome-Wide Association Studies for Growth and Meat Production Traits in Sheep	10.1371/journal.pone.0066569	2013	PloS One	Sunit sheep, German Mutton sheep, Dorper sheep	319	GWAS	Illumina 50K ovine	post-weaning gain	OAR8_75441328.1			6.13e-06	8	70297581					GRM1			OAR8_75441328.1	8	70297581	0.8661	[A/G]	TOP	BOT	rs401132173	ss836349681
										OAR17_34475530.1			9.35e-06	17	31550788					POL			OAR17_34475530.1	17	31550788	0.823	[A/G]	TOP	BOT	rs421474508	ss836329571
										s58995.1			9.66e-06	5	3858663					MEF2B, FXANK			s58995.1	5	3858663	0.8595	[T/C]	BOT	TOP	rs420767326	ss836364327
										OAR3_84073899.1			1e-05	3	79511180					CAMKMT			OAR3_84073899.1	3	79511180	0.909	[T/C]	BOT	TOP	rs420220919	ss836341748
										OAR2_169649708.1			1.02e-05	2	160096561					MBD5			OAR2_169649708.1	2	160096561	0.7159	[A/G]	TOP	BOT	rs413773852	ss836332679
										OAR3_115712045.1			1.14e-05	3	108653757					TRHDE			OAR3_115712045.1	3	108653757	0.9023	[A/C]	TOP	TOP	rs401775061	ss836339107
										s72649.1			9.51e-05	20	16315464					UBR2			s72649.1	20	16315464	0.841	[T/C]	BOT	BOT	rs412479706	ss836367080
										OAR9_91721507.1			0.0135	9	86514456					RIPK2			OAR9_91721507.1	9	86514456	0.9066	[T/C]	BOT	BOT	rs417614197	ss836351245
										s09135.1			0.0191	2	191583896					RPL7			s09135.1	2	191583896	0.8265	[A/G]	TOP	TOP	rs421307778	ss836354168
										OAR2_19203817.1			0.0498	2	18820353					SMC2			OAR2_19203817.1	2	18820353	0.8226	[T/C]	BOT	TOP	rs421393154	ss836333069
Jalil-Sarghale et al.	Association of pituitary specific transcription factor-1 (POU1F1) gene polymorphism with growth and biometric traits and blood metabolites in Iranian Zel and Lori-Bakhtiari sheep	10.1007/s11033-014-3451-8	2014	Mol Biol Report	Zel and Lori-Bakhtiari	90	gene candidate		weaning weight	AJ549206:g.739G >A							A	G		POU1F1			NA	NA	NA	NA	NA	NA	NA	NA	NA
Al-Mamun et al.	Genome-wide association study of body weight in Australian Merino sheep reveals an orthologous region on OAR6 to human and bovine genomic regions affecting height and weight	10.1186/s12711-015-0142-4	2015	Genetics Selection Evolution	Australian Merino	1781	GWAS	Illumina 50K ovine	body weight	OAR6_41936490.1	2.12		2.37e-16	6	37694563								OAR6_41936490.1	6	37694564	0.806	[T/C]	BOT	TOP	rs427759689	ss836346151
										s17946.1	-2.13		7.97e-14	6	37164383								s17946.1	6	37164263	0.8622	[A/G]	TOP	TOP	NULL	NULL
										OAR6_41877997.1	-1.88		2.48e-12	6	37640732								NA	NA	NA	NA	NA	NA	NA	NA	NA
										OAR3_128968872.1	-1.63		2.16e-11	3	120960429								OAR3_128968872.1	3	120960429	0.8026	[A/G]	TOP	TOP	rs427339855	ss836339347
										OAR6_41003295.1	-1.74		2.4e-11	6	36819342								OAR6_41003295.1	6	36819222	0.8948	[A/C]	TOP	BOT	rs419653967	ss836346139
										OAR14_57922732.1	2.28		3.21e-10	14	57922732								OAR14_57922732.1	6	38580198	0.8537	[A/C]	TOP	TOP	rs411426349	ss836327120
										OAR6_42945420.1	2.28		3.21e-10	6	38567455								NA	NA	NA	NA	NA	NA	NA	NA	NA
										OAR12_19764133.1	-1.48		5.82e-10	12	16922406								OAR12_19764133.1	12	16922406	0.7915	[T/C]	BOT	TOP	rs420702695	ss836325034
										s41303.1	-1.47		8.8e-10	7	77974470								s41303.1	7	77974350	0.894	[A/C]	TOP	BOT	rs401111583	ss836360664
										OAR6_40449774.1	-2.08		7.94e-09	6	36234302								OAR6_40449774.1	6	36234302	0.8143	[T/C]	BOT	BOT	rs416694099	ss836346133
										OAR14_33804119.1	-1.94		1.1e-08	14	32425979								OAR14_33804119.1	14	32425979	0.8643	[T/C]	BOT	BOT	rs428152840	ss836326921
										OAR6_41558126.1	1.69		1.12e-08	6	37334387								OAR6_41558126.1	6	37334387	0.8722	[T/G]	BOT	TOP	rs159958223	ss836346144
										OAR10_28234413.1	1.35		1.23e-08	10	28220524								OAR10_28234413.1	10	28220524	0.7715	[T/C]	BOT	BOT	rs408604668	ss836323304
										OAR3_170046187.1	1.54		2.14e-08	3	158959518								OAR3_170046187.1	3	158959518	0.8184	[A/G]	TOP	BOT	rs407025577	ss836339998
										s10875.1	-1.69		2.29e-08	19	55289603								s10875.1	19	55289483	0.9054	[G/C]	BOT	TOP	rs404704213	ss836354490
										OAR3_79625099.1	1.47		2.54e-08	3	75408156								OAR3_79625099.1	3	75408036	0.7689	[T/C]	BOT	BOT	rs399968631	ss836341689
										OAR6_40409402.1	2.34		3.3e-08	6	36192023								NA	NA	NA	NA	NA	NA	NA	NA	NA
										OAR2_200781582.1	1.85		3.31e-08	2	189390300								NA	NA	NA	NA	NA	NA	NA	NA	NA
										OAR6_40370293.1	-1.59		3.39e-08	6	36155169								NA	NA	NA	NA	NA	NA	NA	NA	NA
										s64523.1	-1.48		3.73e-08	1	12775585								s64523.1	1	12775585	0.7558	[A/C]	TOP	TOP	rs412944796	ss836365414
										OAR6_42247197.1	-1.65		4.04e-08	6	37987281								OAR6_42247197.1	6	37987281	0.8353	[A/G]	TOP	BOT	rs408203768	ss836346155
										OAR10_62872792.1	1.28		4.49e-08	10	61341529								OAR10_62872792.1	10	61341529	0.7019	[A/G]	TOP	TOP	rs424484718	ss836323901
										s66267.1	-1.3		4.72e-08	23	58323699								NA	NA	NA	NA	NA	NA	NA	NA	NA
										OAR12_2311264.1	-1.73		5.44e-08	12	3371387								OAR12_2311264.1	12	3371387	0.8919	[A/G]	TOP	BOT	rs427216282	ss836325095
										OAR8_49852851.1	1.23		5.48e-08	8	46382226								OAR8_49852851.1	8	46382226	0.8796	[A/G]	TOP	BOT	rs424327853	ss836349242
										OAR2_33892911.1	-1.47		5.55e-08	2	32570329								OAR2_33892911.1	2	32570209	0.8462	[A/G]	TOP	TOP	rs416339139	ss836334165
										OAR7_88735490.1	1.44		6.82e-08	7	81383811								OAR7_88735490.1	7	81383811	0.8121	[A/G]	TOP	BOT	rs160362919	ss836348382
										OAR6_40724811_X.1	-1.91		7.41e-08	6	36522166								NA	NA	NA	NA	NA	NA	NA	NA	NA
										OAR1_141580492.1	-1.27		1.07e-07	1	130797358								OAR1_141580492.1	1	130797358	0.8427	[A/C]	TOP	BOT	rs407668795	ss836319706
										s36305.1	-1.79		1.08e-07	13	61597135								s36305.1	13	61597135	0.8474	[A/C]	TOP	BOT	rs415960079	ss836359638
										OAR7_81534131.1	1.27		1.11e-07	7	74570199								OAR7_81534131.1	7	74570200	0.8328	[A/G]	TOP	BOT	rs422582761	ss836348292
										s29813.1	1.29		1.11e-07	14	52182942								NA	NA	NA	NA	NA	NA	NA	NA	NA
										s43545.1	-3.49		1.15e-07	15	74500105								s43545.1	15	74499985	0.7362	[A/G]	TOP	TOP	rs406668229	ss836361094
										OAR6_40855809.1	1.61		1.16e-07	6	36655091								OAR6_40855809.1	6	36655091	0.8669	[T/C]	BOT	TOP	rs400970883	ss836346137
										s40612.1	1.26		1.24e-07	2	182039142								s40612.1	2	182039142	0.7648	[A/G]	TOP	TOP	rs398692769	ss836360518
										s35115.1	1.7		1.42e-07	3	14572165								s35115.1	3	14572045	0.8963	[T/C]	BOT	BOT	rs411726913	ss836359397
										s38098.1	-2.02		1.7e-07	14	23489233								s38098.1	14	23489233	0.7848	[T/C]	BOT	BOT	rs401153682	ss836360017
										OAR6_41768532.1	1.54		1.85e-07	6	37533664								OAR6_41768532.1	6	37533664	0.8967	[A/G]	TOP	TOP	rs415940846	ss836346147
										s05777.1	1.48		2e-07	8	30348320								s05777.1	8	30348200	0.8827	[T/C]	BOT	BOT	rs428958714	ss836353479
Ma et al.	Effect of polymorphisms in the CAMKMT gene on growth traits in Ujumqin sheep	10.1111/age.12455	2016	Animal Genetics	Ujumqin	343	gene candidate		body weight and chest girth at 4 months of age and with body weight, chest girth and chest width at 6 months of age	SNP07							A	G		CAMKMT	ACGTTGGATGAACCGTGTCCTGTAGATGTG	ACGTTGGATGGGCTTGATATGTTCCCAGTC	NA	NA	NA	NA	NA	NA	NA	NA	NA
									body weight and chest girth at 4 months of age and with body weight, chest girth and chest width at 6 months of age	SNP27							C	A		CAMKMT	ACGTTGGATGGCAACCAGGGTGAGCTTTTA	ACGTTGGATGACCATCTACTTGCATCACCG	NA	NA	NA	NA	NA	NA	NA	NA	NA
									body weight and chest girth at 4 months of age and with chest girth at 6 months of age	SNP28							C	G		CAMKMT	ACGTTGGATGGCTACCTAGGATTGAGAGAG	ACGTTGGATGAGGCATTAGAGCATTGTGGG	NA	NA	NA	NA	NA	NA	NA	NA	NA
									body weight and shin circumfer- ence at 4 months of age and with post-weaning gain	SNP31							A	G		CAMKMT	ACGTTGGATGCAGATTCATGTCTTACGCTG	ACGTTGGATGAGTTTGTATTTGGAGCACAC	NA	NA	NA	NA	NA	NA	NA	NA	NA
Bolormaa et al.	Detailed phenotyping identifies genes with pleiotropic effects on body composition	10.1186/s12864-016-2538-0	2016	BMC Genomics	Merino, MER; Poll Dorset, PD; Border Leicester, BL; Suffolk, SUF; white Suffolk, WS;Texel, TEX;Corrie- dale, CORR; Coopworth, COOP; and various Crosses, MIX	10613	GWAS (meta-analysis)	Ovine Infinium® HD SNP Bead- Chip, Illumina 50k Ovine	Multivariate phenotype from 56 original traits					16	31882270					GHR			OAR16_34620156.1	16	31882270	0.8692	[T/C]	BOT	TOP	rs422431427	ss836328572
														14	34761382					LCAT			oar3_OAR14_34761382	14	34761382	0.8063	[A/G]	TOP	TOP	rs193642318	ss892025475
														11	26445930					SLC16A13/TP53			oar3_OAR11_26445930	11	26445930	0.7067	[A/G]	TOP	TOP	rs161042491	ss889120270
														6	37530647					LCORL			oar3_OAR6_37530647	6	37530647	0.9002	[A/G]	TOP	BOT	rs401834107	ss882802484
														26	13991962					ACSL1			oar3_OAR26_13991962	26	13991962	0.8505	[T/C]	BOT	TOP	rs414965233	ss901397877
														11	13272203								oar3_OAR11_13272203	11	13272203	0.8163	[A/G]	TOP	BOT	rs415213718	ss888957711
														11	49936709					FASN			oar3_OAR11_49936709	11	49936709	0.8248	[T/C]	BOT	BOT	rs402529684	ss889359097
														6	15245427					SNORA70			oar3_OAR6_15245427	6	15245427	0.8245	[T/G]	BOT	TOP	rs400234641	ss882516754
														19	57102703					MRPS25			oar3_OAR19_57102703	19	57102703	0.8591	[T/C]	BOT	BOT	rs161286973	ss897026760
														2	219569259					PLCD4			oar3_OAR2_219569259	2	219569259	0.8099	[T/C]	BOT	TOP	rs422901910	ss876224731
														3	178935942					APOL6			oar3_OAR3_178935942	3	178935942	0.8418	[T/C]	BOT	BOT	rs430269081	ss878815225
														5	93437720					CAST			oar3_OAR5_93437720	5	93437720	0.853	[A/G]	TOP	TOP	rs415436650	ss882067977
														18	64496663					MEG8_2			oar3_OAR18_64496663	18	64496663	0.7494	[A/C]	TOP	TOP	rs10721332	ss896249108
														8	25030751					LAMA4			oar3_OAR8_25030751	8	25030751	0.7545	[A/G]	TOP	TOP	rs420936165	ss885502637
														22	20348430					PKD2L1/SCD			oar3_OAR22_20348430	22	20348430	0.6577	[A/G]	TOP	BOT	rs399854927	ss898737624
														12	49639530					SAMD11			oar3_OAR12_49639530	12	49639530	0.8126	[A/G]	TOP	TOP	rs422804052	ss890176727
														14	54580893					GYS1			oar3_OAR14_54580893	14	54580893	0.7545	[A/C]	TOP	BOT	rs418208593	ss892247888
														3	218656000					PNPLA3			oar3_OAR3_218656000	3	218656000	0.8586	[A/G]	TOP	BOT	rs408466848	ss879304067
														21	39759701					FADS2			oar3_OAR21_39759701	21	39759701	0.8574	[A/G]	TOP	BOT	rs413442903	ss898333424
														19	30808702					5S_rRNA			OAR19_32455496.1	19	30808702	0.7662	[A/C]	TOP	TOP	rs425952765	ss836331140
														20	44129579					SMIM13			oar3_OAR20_44129579	20	44129579	0.7388	[A/G]	TOP	TOP	rs416668536	ss897662062
														21	14965281								oar3_OAR21_14965281	21	14965281	0.8752	[T/C]	BOT	BOT	rs405528872	ss897986617
														15	47513135					U1			oar3_OAR15_47513135	15	47513135	0.6361	[T/C]	BOT	BOT	rs429709432	ss892988955
Trukhachev et al.	MEF2B gene SNP markers of meat productivity in Severokavkazskaya sheep breed	10.2298/GENSR1601097T	2016	Genetika	Severokavkazskaya	19	gene candidate		meat productivity	rs413905991							C	T	0.87	MEF2B			NA	NA	NA	NA	NA	NA	NA	NA	NA
										rs401426310							G	A	0.13	MEF2B			NA	NA	NA	NA	NA	NA	NA	NA	NA
Cinar et al.	Ovar-DRB1 haplotypes *2001 and *0301 are associated with sheep growth and ewe lifetime prolificacy	10.1016/j.gene.2016.10.004	2016	Gene	Rambouillet, Columbia, Polypay	370	gene candidate		sheep growth and ewe lifetime prolificacy														NA	NA	NA	NA	NA	NA	NA	NA	NA
Matika et al.	Genome-wide association reveals QTL for growth, bone and in vivo carcass traits as assessed by computed tomography in Scottish Blackface lambs	10.1186/s12711-016-0191-3	2016	Genetics Selection Evolution	Scottish Blackface lamb	751	GWAS	Illumina 50K ovine	Bone area at the ischium	OAR6_40855809			2.63E‑09	6	36655091								OAR6_40855809.1	6	36655091	0.8669	[T/C]	BOT	TOP	rs400970883	ss836346137
										OAR6_40277406			4.66E‑09	6	36073405								OAR6_40277406.1	6	36073405	0.8737	[A/G]	TOP	TOP	rs404689832	ss836346129
										OAR6_40311379			5.19E‑09	6	36104954								OAR6_40311379.1	6	36104954	0.9044	[A/T]	TOP	TOP	rs415957257	ss836346130
										DU178311_404			4.58E‑08	6	36839547								DU178311_404.1	6	36839547	0.8828	[A/G]	TOP	BOT	rs55631803	ss836318748
										OAR6_42576838			9.24E‑08	6	38310652								OAR6_42576838.1	6	38310652	0.7797	[A/G]	TOP	TOP	rs411754410	ss836346164
										OAR6_40955920			3.52E‑07	6	36750972								OAR6_40955920.1	6	36750972	0.898	[T/C]	BOT	TOP	rs408285730	ss836346138
										OAR6_45662944			9.51E‑07	6	40975597								OAR6_45662944.1	6	40975597	0.8666	[A/G]	TOP	BOT	rs419926415	ss836346219
									Bone weight	OAR6_40855809			5.55E‑08	6	36655091								OAR6_40855809.1	6	36655091	0.8669	[T/C]	BOT	TOP	rs400970883	ss836346137
										OAR6_40277406			1.12E‑06	6	36073405								OAR6_40277406.1	6	36073405	0.8737	[A/G]	TOP	TOP	rs404689832	ss836346129
									Fat weight accounting for live weight	DU178311_404			1.23E‑06	6	36839547								DU178311_404.1	6	36839547	0.8828	[A/G]	TOP	BOT	rs55631803	ss836318748
									Muscle density at the 8th thoracic vertebra	s66995			7.28E‑07	1	275593974								NA	NA	NA	NA	NA	NA	NA	NA	NA
Zhang et al.	Identification of MEF2B and TRHDE Gene Polymorphisms Related to Growth Traits in a New Ujumqin Sheep Population	10.1371/journal.pone.0159504	2016	PloS One	Ujumqin	343	gene candidate		growth traits	rs417014745							A	G		MEF2B			NA	NA	NA	NA	NA	NA	NA	NA	NA
										rs426980328							T	C		TRHDE			NA	NA	NA	NA	NA	NA	NA	NA	NA
										rs430810656							G	A		TRHDE			NA	NA	NA	NA	NA	NA	NA	NA	NA
Xu et al.	Recent advances in understanding genetic variants associated with economically important traits in sheep (Ovis aries) revealed by high-throughput screening technologies	10.15302/J-FASE-2017151	2017	Frontiers of Agricultural Science and Engineering			review																NA	NA	NA	NA	NA	NA	NA	NA	NA
Aali et al.	Association of the calpastatin genotypes, haplotypes, and SNPs with meat quality and fatty acid composition in two Iranian fat- and thin-tailed sheep breeds	10.1016/J.SMALLRUMRES.2016.12.026	2017	Small Ruminant Research	Chall and Zel Iranian	59	gene candidate		fatty acid composition & meat quality												5'-GTTATGAATTGCTTTCTACTC-3	5'-ATACGATTGAGAGACTTCAC-3'	NA	NA	NA	NA	NA	NA	NA	NA	NA
Sahu et al.	Advances in genomic strategies to improve growth and meat production traits in sheep: An overview	10.5958/0973-9718.2017.00052.6	2017	Indian Journal of Small Ruminants					growth and meat production traits														NA	NA	NA	NA	NA	NA	NA	NA	NA
Kominakis et al.	Combined GWAS and ‘guilt by association’-based prioritization analysis identifies functional candidate genes for body size in sheep	10.1186/s12711-017-0316-3	2017	Genetics Selection Evolution	Frizarta	524	GWAS	Illumina 50K ovine	PC1, width dimension	OAR8_65677467.1			1.67E−05	8	60857281					TP53			OAR8_65677467.1	8	60924889	0.8114	[A/C]	TOP	TOP	rs399162962	ss836349509
										s16706.1			1.91E−05	25	40519001								s16706.1	25	40646547	0.7764	[T/C]	BOT	TOP	rs412799004	ss836355653
										s75176.1			3.18E−05	12	15687883								s75176.1	12	15737178	0.8336	[T/C]	BOT	BOT	rs424667280	ss836367562
										s09443.1			6.34E−05	25	26277908								s09443.1	25	26377075	0.7043	[A/G]	TOP	BOT	rs415008490	ss836354225
										OAR20_41133825.1			3.97E−05	20	37570240								OAR20_41133825.1	20	37681935	0.8044	[A/C]	TOP	BOT	rs425918321	ss836335534
									PC2, height dimension	s49406.1			1.96E−05	11	27245550								NA	NA	NA	NA	NA	NA	NA	NA	NA
										OAR23_33457070.1			2.58E−05	23	31731118								OAR23_33457070.1	23	31778945	0.8054	[A/G]	TOP	TOP	rs400533660	ss836337146
										OAR10_65976077.1			4.03E−05	10	63659341					BMPR1A			OAR10_65976077.1	10	63706057	0.8454	[A/G]	TOP	BOT	rs405146973	ss836323942
										OAR9_32819540.1			2.10E−05	9	31286828					PIK3R5			OAR9_32819540.1	9	31387692	0.8861	[T/G]	BOT	BOT	rs408948541	ss836350294
									PC3, length dimension	s19829.1			0.32E−05	3	168000000					RPL26			s19829.1	3	168623388	0.8732	[T/C]	BOT	BOT	rs403588033	ss836356259
										OAR19_41234161.1			0.99E−05	19	39335737					PRKDC			OAR19_41234161.1	19	39321899	0.8009	[A/G]	TOP	TOP	rs410945647	ss836331282
Pasandideh et al.	A genome scan for quantitative trait loci affecting average daily gain and Kleiber ratio in Baluchi Sheep	10.1007/s12041-018-0941-9	2018	Journal of Genetics	Baluchi	96	GWAS	Illumina 50K ovine	Kleiber ratio	OAR7_31307164			1.45E−07	7	27580032					KCNIP4			NA	NA	NA	NA	NA	NA	NA	NA	NA
										OAR19_37632125			1.11E−06	19	35906837					ARHGEF40			NA	NA	NA	NA	NA	NA	NA	NA	NA
Garza Hernandez et al	Analysis of single nucleotide polymorphisms variation associated with important economic and computed tomography measured traits in Texel sheep	10.1017/S1751731117002488	2018	animal	Texel	384	GWAS	Illumina 50K ovine	8-week body weight	OAR17_22884911.1	−0.388		3.9e-05	17	20425356					PCDH18			OAR17_22884911.1	17	20425356	0.8801	[A/G]	TOP	TOP	rs414335128	ss836329367
									fat depth	OAR16_20147789.1	−0.439		1.3e-05	16	18368560					NDUFAF2			OAR16_20147789.1	16	18368560	0.8122	[T/C]	BOT	BOT	rs425656801	ss836328332
									CT lean weight	s26074.1	0.673		2.6e-05	11	8271088					CUEDC1			NA	NA	NA	NA	NA	NA	NA	NA	NA
									muscle depth	OAR11_12972551.1	−1.115		1.7e-05	11	13110133					ACACA			OAR11_12972551.1	11	13110133	0.819	[T/G]	BOT	BOT	rs422493894	ss836324347
Armstrong et al.	Novel genetic polymorphisms associated with carcass traits in grazing Texel sheep	10.1016/j.meatsci.2018.06.014	2018	Meat Science	Texel	461	gene candidate		birth weight (kg)	rs404358363	0.048	0.007	9.62e-11	5	93372631		C		0.437	CAST			OAR5_101742566.1	5	93372631	0.8452	[A/G]	TOP	BOT	rs404358363	ss836343862
									birth weight (kg)	rs408124092	0.043	0.007	1.4e-09	16	31955661		C		0.475	GHR			OAR16_34694443.1	16	31955661	0.8228	[A/G]	TOP	BOT	rs408124092	ss836328574
									birth weight (kg)	rs411875883	-0.033	0.009	0.000264	9	13567064		T		0.229	DGAT1			NA	NA	NA	NA	NA	NA	NA	NA	NA
									birth weight (kg)	NA	0.031	0.008	3.96e-05	4	65339073		C		0.374	SERPINA3			NA	NA	NA	NA	NA	NA	NA	NA	NA
									birth weight (kg)	NA	-0.021	0.006	0.000246	4	65339073		T		0.396	SERPINA3			NA	NA	NA	NA	NA	NA	NA	NA	NA
									weaning weight (kg)	rs400358099	0.174	0.042	4.11e-05	4	65363696		T		0.305	GHRHR			NA	NA	NA	NA	NA	NA	NA	NA	NA
									weaning weight (kg)	rs411875883	-0.271	0.046	6.43e-09	9	13567064		T		0.229	DGAT1			NA	NA	NA	NA	NA	NA	NA	NA	NA
									weaning weight (kg)	rs162232868	0.195	0.042	5.46e-06	24	34257767		T		0.314	HSPB1			NA	NA	NA	NA	NA	NA	NA	NA	NA
									weaning weight (kg)	NA	-0.127	0.03	3.13e-05	4	65339073		T		0.396	SERPINA3			NA	NA	NA	NA	NA	NA	NA	NA	NA
									weight at the time of ultrasound scanning (kg)	rs400358099	0.277	0.061	6.7e-06	4	65363696		T		0.305	GHRHR			NA	NA	NA	NA	NA	NA	NA	NA	NA
									weight at the time of ultrasound scanning (kg)	rs411875883	-0.306	0.068	7.66e-06	9	13567064		T		0.229	DGAT1			NA	NA	NA	NA	NA	NA	NA	NA	NA
									weight at the time of ultrasound scanning (kg)	rs593786039	0.245	0.067	0.000301	15	53356445		T		0.214	DGAT2			NA	NA	NA	NA	NA	NA	NA	NA	NA
									weight at the time of ultrasound scanning (kg)	rs161279544	-0.186	0.057	0.00117	19	52141808		T		0.467	SCAP			s49822.1	19	52141808	0.7225	[T/C]	BOT	BOT	rs161279544	ss836362393
									back-fat thickness (mm)	rs404358363	0.042	0.008	3.16e-07	5	93372631		C		0.437	CAST			OAR5_101742566.1	5	93372631	0.8452	[A/G]	TOP	BOT	rs404358363	ss836343862
									back-fat thickness (mm)	rs400358099	0.034	0.009	0.000133	4	65363696		T		0.305	GHRHR			NA	NA	NA	NA	NA	NA	NA	NA	NA
									back-fat thickness (mm)	rs411875883	-0.034	0.01	0.000807	9	13567064		T		0.229	DGAT1			NA	NA	NA	NA	NA	NA	NA	NA	NA
									back-fat thickness (mm)	NA	0.028	0.008	0.000916	4	65339073		C		0.374	SERPINA3			NA	NA	NA	NA	NA	NA	NA	NA	NA
									rib-eye area (cm2)	rs411875883	-0.099	0.02	8.28e-07	9	13567064		T		0.229	DGAT1			NA	NA	NA	NA	NA	NA	NA	NA	NA
									rib-eye area (cm2)	rs423661926	0.089	0.017	1.9e-07	6	97095576		C		0.406	SCD5			s01116.1	6	97095576	0.8543	[A/C]	TOP	TOP	rs423661926	ss836352554
									hot carcass weight (kg)	rs404920215	-0.275	0.067	4.85e-05	6	43309694		T		0.081	PPARGC1A			OAR6_48259046.1	6	43309694	0.7785	[A/C]	TOP	BOT	rs404920215	ss836346272
									hot carcass weight (kg)	rs411875883	-0.188	0.05	0.000186	9	13567064		T		0.243	DGAT1			NA	NA	NA	NA	NA	NA	NA	NA	NA
									measurement of carcass fatness grade (mm)	rs408124092	0.098	0.023	3.8e-05	16	31955661		C		0.418	GHR			OAR16_34694443.1	16	31955661	0.8228	[A/G]	TOP	BOT	rs408124092	ss836328574
									measurement of carcass fatness grade (mm)	rs416797391	0.088	0.026	0.000721	13	19014803		C		0.47	ITGB1			NA	NA	NA	NA	NA	NA	NA	NA	NA
									measurement of carcass fatness grade (mm)	rs409057171	0.126	0.03	3.68e-05	6	43321031		A		0.207	PPARGC1A			NA	NA	NA	NA	NA	NA	NA	NA	NA
									measurement of carcass fatness grade (mm)	NA	-0.071	0.02	0.00054	4	65339073		T		0.373	SERPINA3			NA	NA	NA	NA	NA	NA	NA	NA	NA
									Leg (g)	rs404920215	-35.273	9.719	0.000345	6	43309694		T		0.082	PPARGC1A			OAR6_48259046.1	6	43309694	0.7785	[A/C]	TOP	BOT	rs404920215	ss836346272
									Shoulder(g)	rs411875883	-30.084	7.494	7.89e-05	9	13567064		T		0.245	DGAT1			NA	NA	NA	NA	NA	NA	NA	NA	NA
									Shoulder(g)	rs404920215	-38.307	10.099	0.000187	6	43309694		T		0.082	PPARGC1A			OAR6_48259046.1	6	43309694	0.7785	[A/C]	TOP	BOT	rs404920215	ss836346272
									Shoulder(g)	rs161279544	-22.206	6.365	0.000574	19	52141808		T		0.484	SCAP			s49822.1	19	52141808	0.7225	[T/C]	BOT	BOT	rs161279544	ss836362393
									Rack (g)	rs404920215	-323.629	5.151	7.16e-06	6	43309694		T		0.083	PPARGC1A			OAR6_48259046.1	6	43309694	0.7785	[A/C]	TOP	BOT	rs404920215	ss836346272
Ghasemi et al.	Genome-wide association study of birth weight in sheep	10.1017/S1751731118003610	2019	animal	Lori-Bakhtiari	132	GWAS	Illumina 50K ovine	Birth weight	rs421198841			1.074e-06	1	7939149					KCNJ13 GIGYF2			NA	NA	NA	NA	NA	NA	NA	NA	NA
										rs423491318			7.572e-07	1	253533863					RAB6B			s54564.1	1	253533863	0.8793	[T/C]	BOT	TOP	rs423491318	ss836363394
										rs405981386			9.242e-07	1	253590200					Tf			NA	NA	NA	NA	NA	NA	NA	NA	NA
										rs409391790			3.489e-06	1	273457763								OAR1_296010698.1	1	273457763	0.7389	[T/C]	BOT	BOT	rs409391790	ss836321933
										rs408337555			8.381e-06	16	22882883								OAR16_24956553.1	16	22882883	0.8904	[A/G]	TOP	TOP	rs408337555	ss836328405
										rs424518440			2.48e-06	19	5555990								s40021.1	19	5555990	0.8482	[T/C]	BOT	BOT	rs424518440	ss836360403
										rs416382582			2.95e-06	22	16910447					OPALIN DNTT TLL2			s21678.1	22	16910447	0.8223	[T/C]	BOT	TOP	rs416382582	ss836356618
